# Supplementary material for: Population mobility reductions associated with travel restrictions during the Ebola epidemic in Sierra Leone: use of mobile phone data
Source: PubMed Central journal article supplement — Int J Epidemiol. 2018 Jun 26;47(5):1562–70. doi: 10.1093/ije/dyy095 (PMC6208277; doi:10.1093/ije/dyy095), 2018-06-26

March 20-22  
Control Period 1

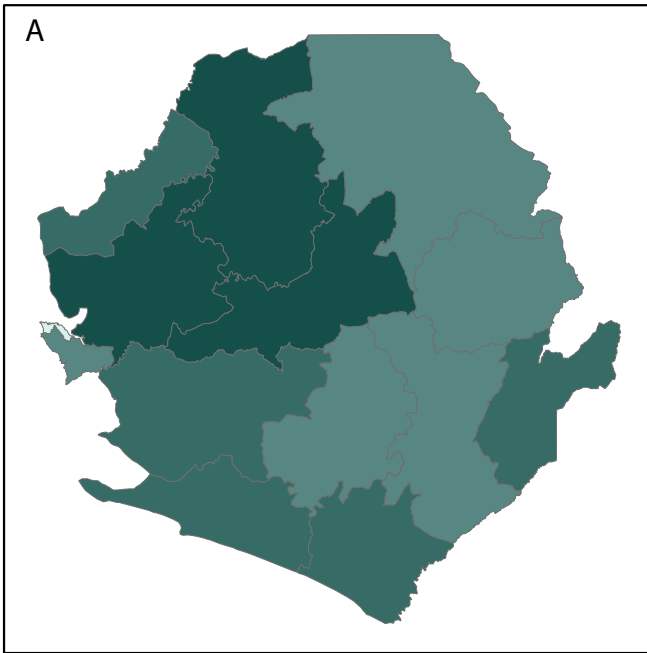

March 27-29  
National Stay at Home Days

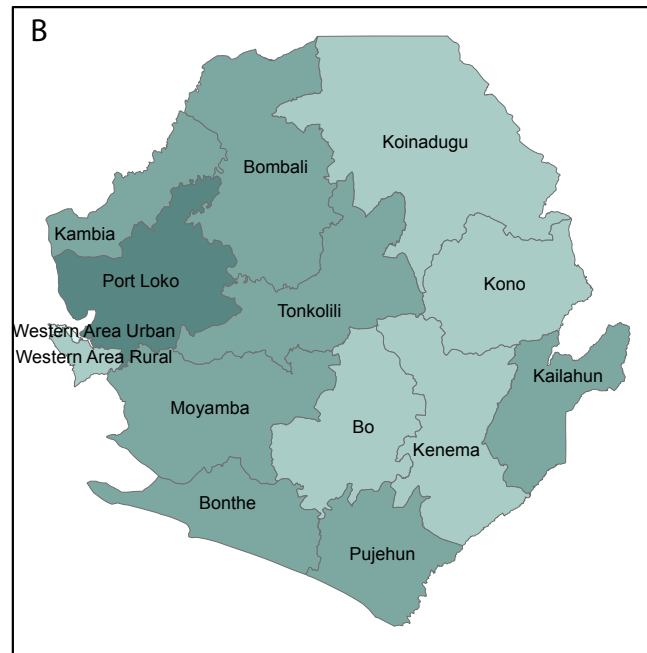

April 2-4  
Control Period 2

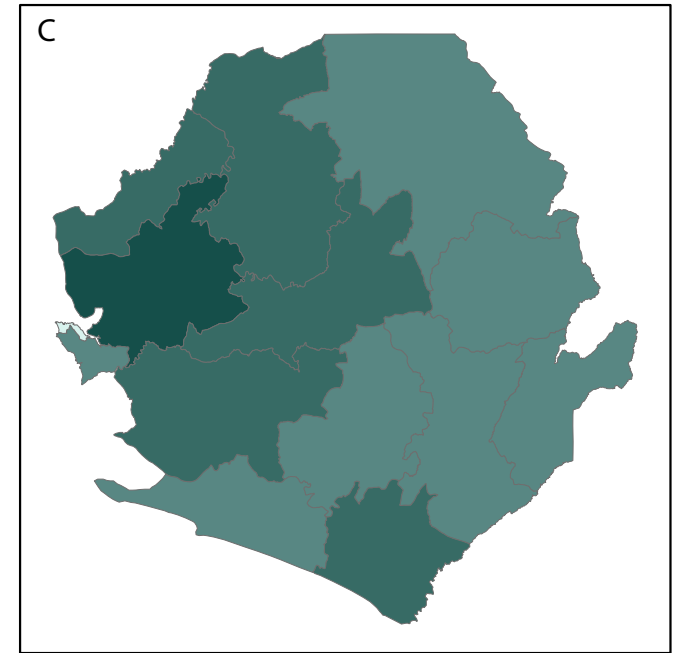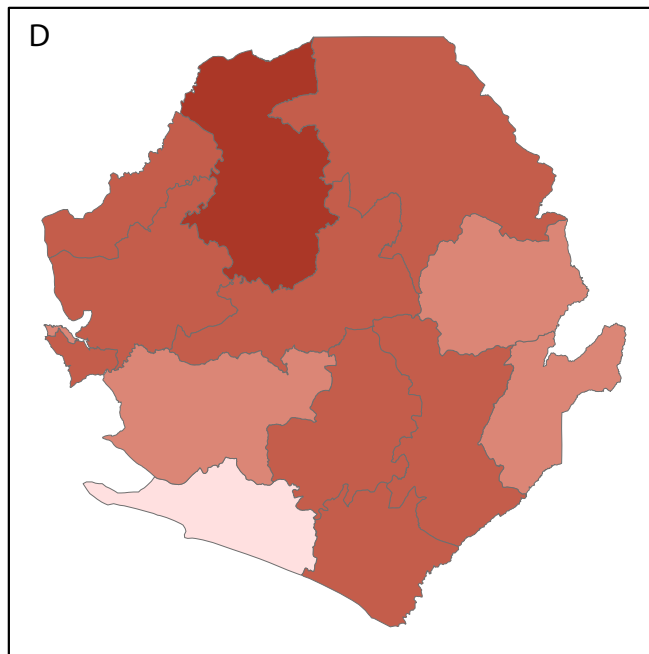

Decrease in Distance Traveled  
Comparator: Control Period 1

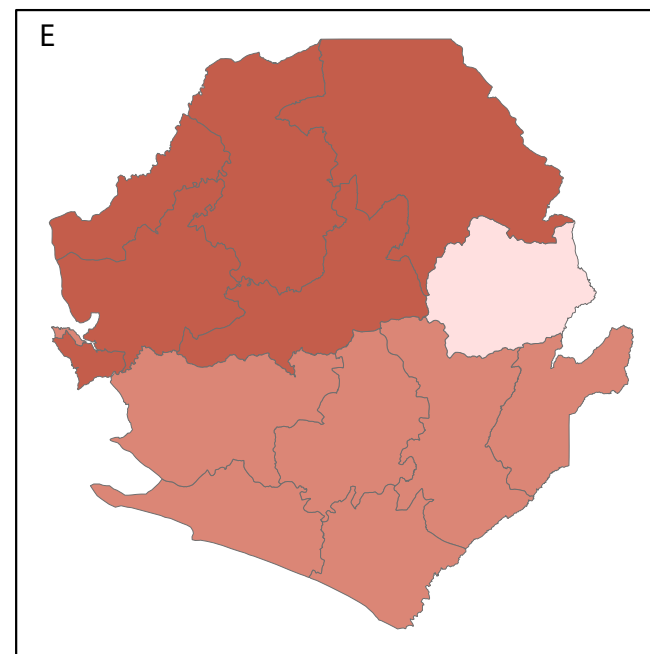

Decrease in Distance Traveled  
Comparator: Control Period 2

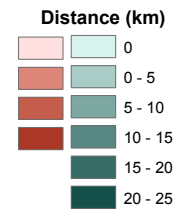

Supplement: dyy095_figure_s3.pdf [file dyy095_figure_s3.pdf]
