# Supplementary figures and images for: Population mobility reductions associated with travel restrictions during the Ebola epidemic in Sierra Leone: use of mobile phone data
Source: PubMed Central journal article supplement — Int J Epidemiol. 2018 Jun 26;47(5):1562–70. doi: 10.1093/ije/dyy095 (PMC6208277; doi:10.1093/ije/dyy095), 2018-06-26

# Number of People per Grid Square

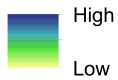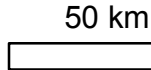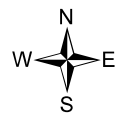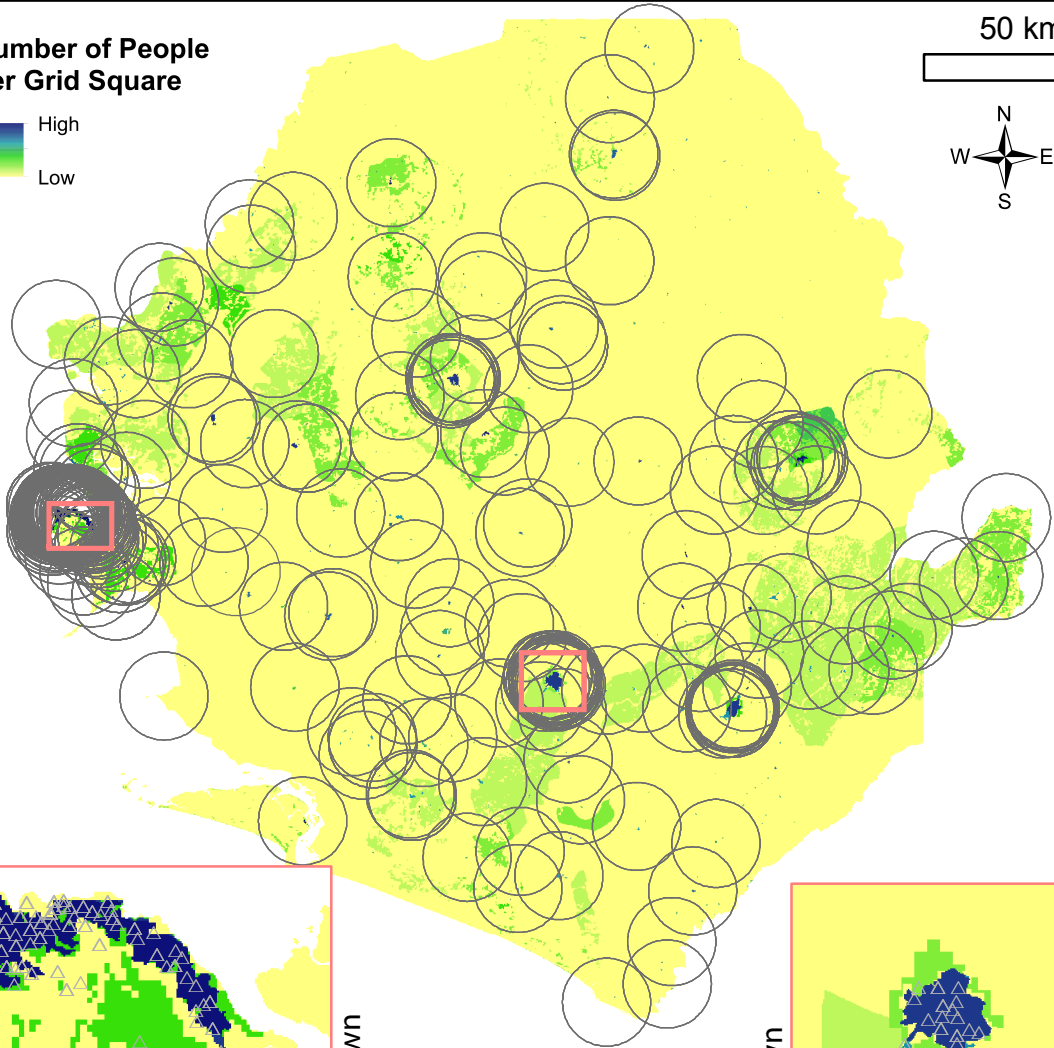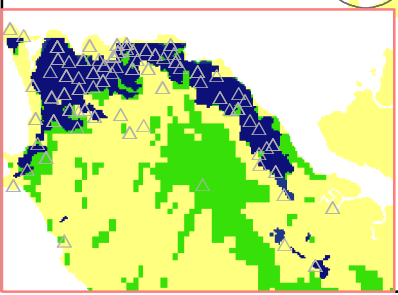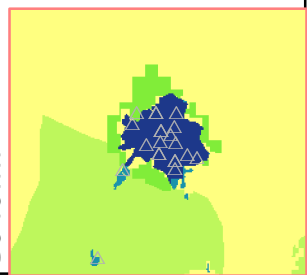

Supplement: dyy095_figure_s1.pdf [file dyy095_figure_s1.pdf]

## Administrative Boundaries

-  District
-  Chiefdom

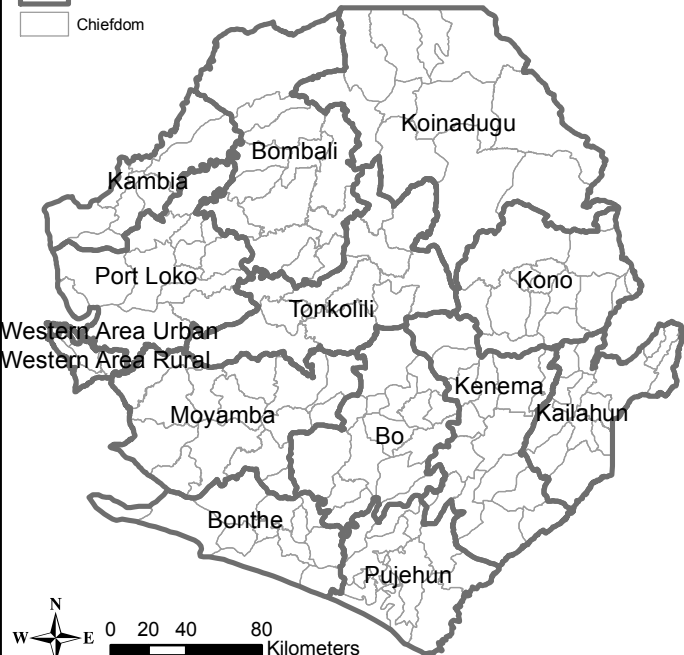

Supplement: dyy095_figure_s2.pdf [file dyy095_figure_s2.pdf]

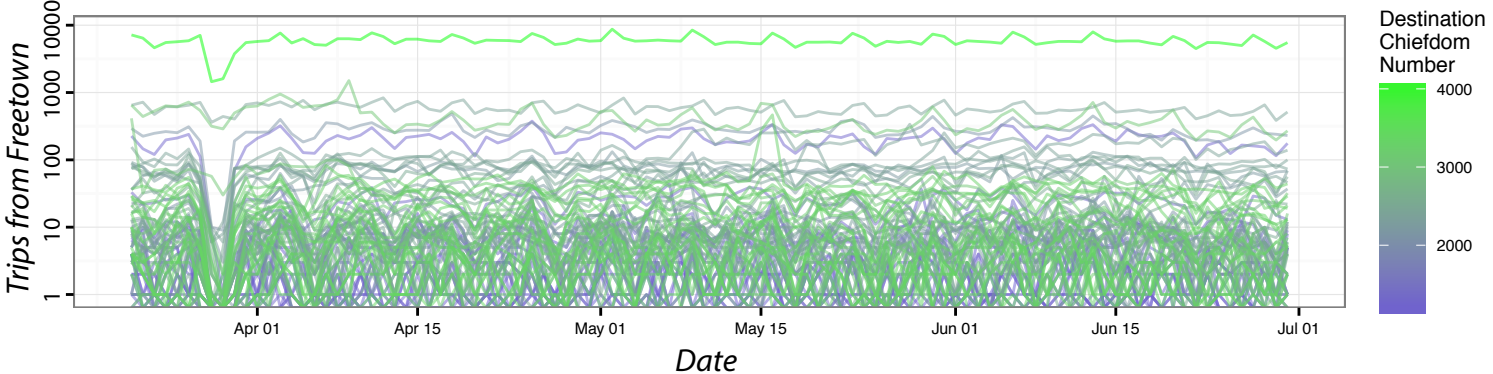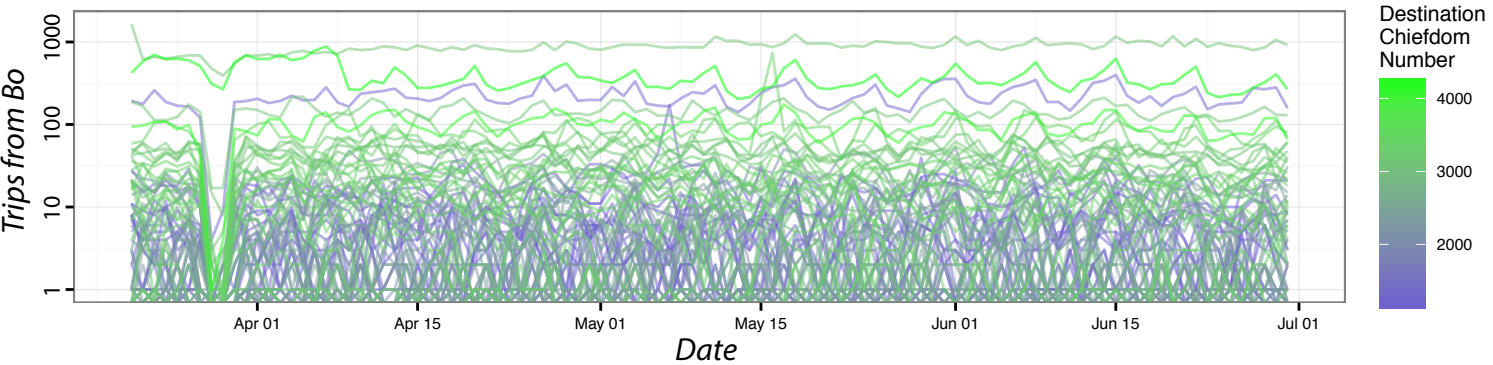

Supplement: dyy095_figure_s4.pdf [file dyy095_figure_s4.pdf]

Number of Travel Anomalies

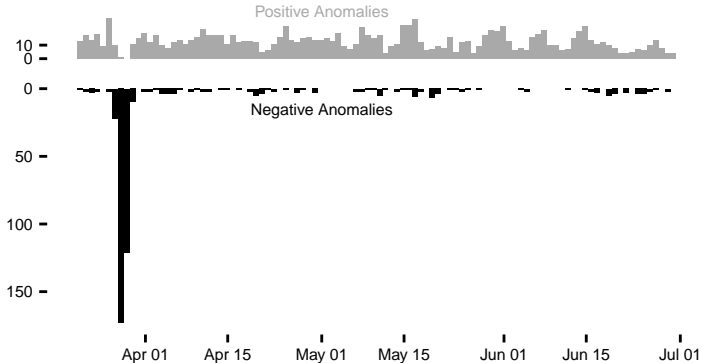

Supplement: dyy095_figure_s5.pdf [file dyy095_figure_s5.pdf]

Number of Travel Anomalies

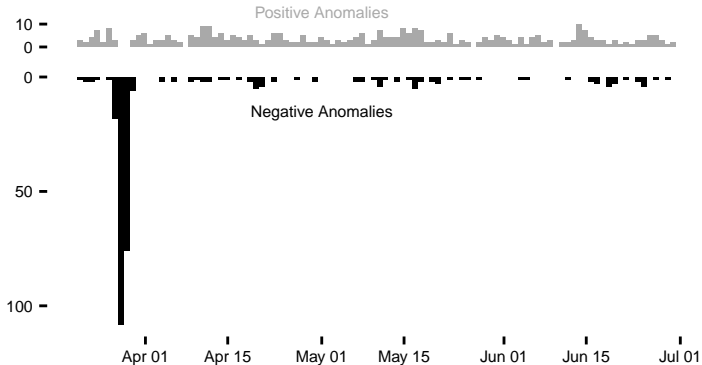

Supplement: dyy095_figure_s6.pdf [file dyy095_figure_s6.pdf]

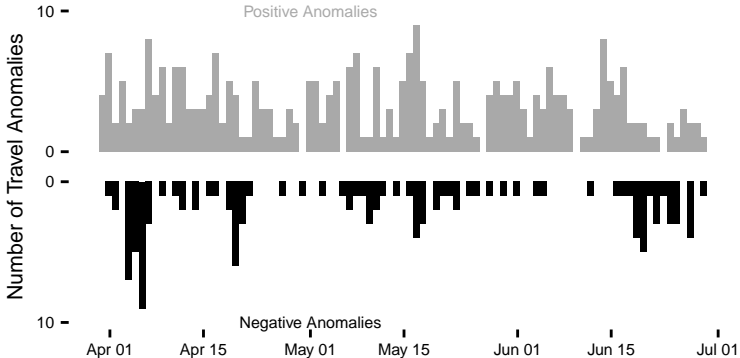

Supplement: dyy095_figure_s7.pdf [file dyy095_figure_s7.pdf]

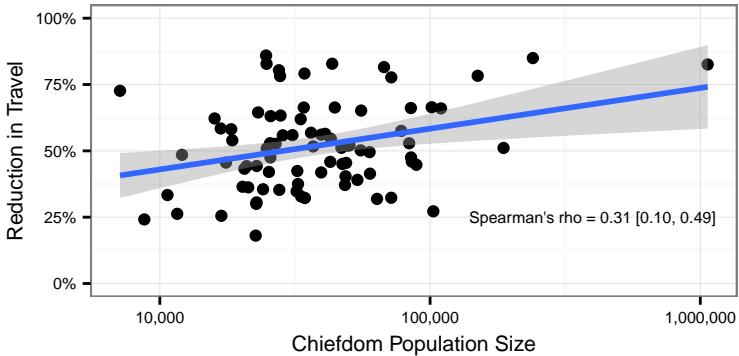

Supplement: dyy095_figure_s8.pdf [file dyy095_figure_s8.pdf]
